# Supplementary material
Source: publisher site journal article supplement (https://www.dovepress.com/article/490815)
Supplement: Supplementary file 1 [file get_supplementary_file.php]

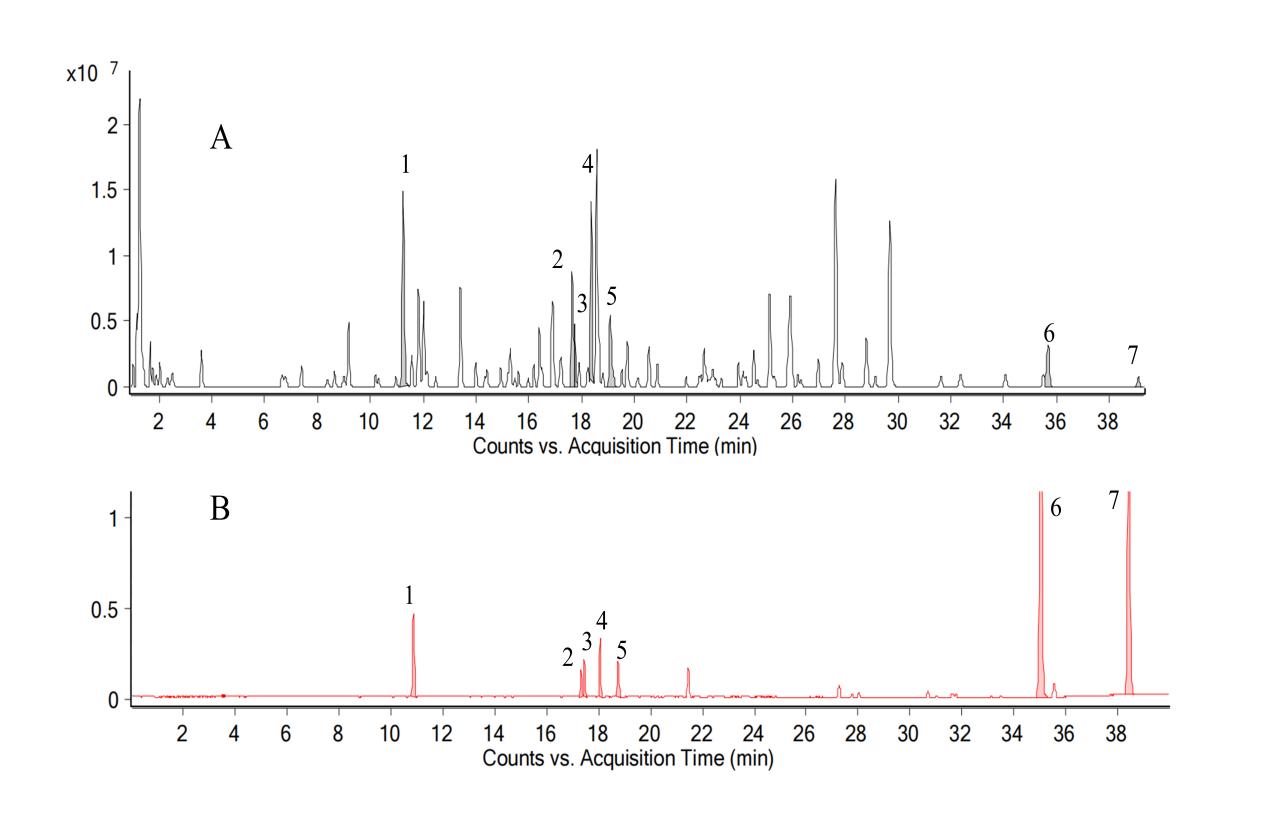


**Figure S1** Identification of the components of XTTG. (A) Total ion flow diagram in positive ion mode for XTTG. (B) Total ion flow diagram in positive ion mode for control (1: Puerarin, 2: Neohesperidin, 3: Notoginseng Saponin R1, 4: Ginsenoside Rg1, 5: Salvianolic Acid B, 6: Cryptotanshinone, 7: Tanshinone IIA).

**Table S1** The contents of identified compounds by UPLC-Q-TOF-MS/MS.

| **Name** | **Concentration μg/mL** | **Content mg/g** |
| --- | --- | --- |
| Puerarin | 58.6 | 2.3077 |
| Neohesperidin | 58.0 | 4.6422 |
| Notoginseng Saponin R1 | 59.1 | 1.3409 |
| Ginsenoside Rg1 | 52.4 | 2.6507 |
| Salvianolic Acid B | 162.1 | 6.3086 |
| Cryptotanshinone | 21.2 | 0.0430 |
| TanshinoneⅡA | 23.2 | 0.0112 |

**Table S2** 229 intersection targets of XTTG and AS

| Entry (Uniprot) | Entry name | Protein names | Gene |
| --- | --- | --- | --- |
| P23219 | PGH1_HUMAN | Prostaglandin G/H synthase 1 | PTGS1 |
| P03372 | ESR1_HUMAN | Estrogen receptor | ESR1 |
| P10275 | ANDR_HUMAN | Androgen receptor | AR |
| P35354 | PGH2_HUMAN | Prostaglandin G/H synthase 2 | PTGS2 |
| Q92731 | ESR2_HUMAN | Estrogen receptor beta | ESR2 |
| P05546 | HEP2_HUMAN | Heparin cofactor 2 | SERPIND1 |
| Q14524 | SCN5A_HUMAN | Sodium channel protein type 5 subunit alpha | SCN5A |
| P08908 | 5HT1A_HUMAN | 5-hydroxytryptamine receptor 1A | HTR1A |
| P28223 | 5HT2A_HUMAN | 5-hydroxytryptamine receptor 2A | HTR2A |
| P07550 | ADRB2_HUMAN | Beta-2 adrenergic receptor | ADRB2 |
| P19793 | RXRA_HUMAN | Retinoic acid receptor RXR-alpha | RXRA |
| P27487 | DPP4_HUMAN | Dipeptidyl peptidase 4 | DPP4 |
| P18031 | PTN1_HUMAN | Tyrosine-protein phosphatase non-receptor type 1 | PTPN1 |
| P04150 | GCR_HUMAN | Glucocorticoid receptor | NR3C1 |
| Q15596 | NCOA2_HUMAN | Nuclear receptor coactivator 2 | NCOA2 |
| P29474 | NOS3_HUMAN | Nitric oxide synthase, endothelial | NOS3 |
| P02766 | TTHY_HUMAN | Transthyretin | TTR |
| P45983 | MK08_HUMAN | Mitogen-activated protein kinase 8 | MAPK8 |
| P02774 | VTDB_HUMAN | Vitamin D-binding protein | GC |
| P62937 | PPIA_HUMAN | Peptidyl-prolyl cis-trans isomerase A | PPIA |
| P42574 | CASP3_HUMAN | Caspase-3 | CASP3 |
| P15121 | ALDR_HUMAN | Aldo-keto reductase family 1 member B1 | AKR1B1 |
| Q06124 | PTN11_HUMAN | Tyrosine-protein phosphatase non-receptor type 11 | PTPN11 |
| P20701 | ITAL_HUMAN | Integrin alpha-L | ITGAL |
| Q16539 | MK14_HUMAN | Mitogen-activated protein kinase 14 | MAPK14 |
| P08254 | MMP3_HUMAN | Stromelysin-1 | MMP3 |
| P45452 | MMP13_HUMAN | Collagenase 3 | MMP13 |
| P37231 | PPARG_HUMAN | Peroxisome proliferator-activated receptor gamma | PPARG |
| P00533 | EGFR_HUMAN | Epidermal growth factor receptor | EGFR |
| P35398 | RORA_HUMAN | Nuclear receptor ROR-alpha | RORA |
| P08235 | MCR_HUMAN | Mineralocorticoid receptor | NR3C2 |
| P49841 | GSK3B_HUMAN | Glycogen synthase kinase-3 beta | GSK3B |
| P12931 | SRC_HUMAN | Proto-oncogene tyrosine-protein kinase Src | SRC |
| P09960 | LKHA4_HUMAN | Leukotriene A-4 hydrolase | LTA4H |
| P04278 | SHBG_HUMAN | Sex hormone-binding globulin | SHBG |
| P23141 | EST1_HUMAN | Liver carboxylesterase 1 | CES1 |
| P08758 | ANXA5_HUMAN | Annexin A5 | ANXA5 |
| Q03181 | PPARD_HUMAN | Peroxisome proliferator-activated receptor delta | PPARD |
| P09211 | GSTP1_HUMAN | Glutathione S-transferase P | GSTP1 |
| P28845 | DHI1_HUMAN | Corticosteroid 11-beta-dehydrogenase isozyme 1 | HSD11B1 |
| P00742 | FA10_HUMAN | Coagulation factor X | F10 |
| P36897 | TGFR1_HUMAN | TGF-beta receptor type-1 | TGFBR1 |
| P78536 | ADA17_HUMAN | Disintegrin and metalloproteinase domain-containing protein 17 | ADAM17 |
| P11362 | FGFR1_HUMAN | Fibroblast growth factor receptor 1 | FGFR1 |
| P00390 | GSHR_HUMAN | Glutathione reductase, mitochondrial | GSR |
| P01009 | A1AT_HUMAN | Alpha-1-antitrypsin | SERPINA1 |
| Q08499 | PDE4D_HUMAN | cAMP-specific 3',5'-cyclic phosphodiesterase 4D | PDE4D |
| P00797 | RENI_HUMAN | Renin | REN |
| P49763 | PLGF_HUMAN | Placenta growth factor | PGF |
| P00326 | ADH1G_HUMAN | Alcohol dehydrogenase 1C | ADH1C |
| Q96RI1 | NR1H4_HUMAN | Bile acid receptor | NR1H4 |
| P02753 | RET4_HUMAN | Retinol-binding protein 4 | RBP4 |
| P04179 | SODM_HUMAN | Superoxide dismutase | SOD2 |
| Q13133 | NR1H3_HUMAN | Oxysterols receptor LXR-alpha | NR1H3 |
| P14555 | PA2GA_HUMAN | Phospholipase A2, membrane associated | PLA2G2A |
| P48736 | PK3CG_HUMAN | Phosphatidylinositol 4,5-bisphosphate 3-kinase catalytic subunit gamma isoform | PIK3CG |
| P10632 | CP2C8_HUMAN | Cytochrome P450 2C8 | CYP2C8 |
| P14174 | MIF_HUMAN | Macrophage migration inhibitory factor | MIF |
| P04035 | HMDH_HUMAN | 3-hydroxy-3-methylglutaryl-coenzyme A reductase | HMGCR |
| P35968 | VGFR2_HUMAN | Vascular endothelial growth factor receptor 2 | KDR |
| Q01469 | FABP5_HUMAN | Fatty acid-binding protein 5 | FABP5 |
| P34913 | HYES_HUMAN | Bifunctional epoxide hydrolase 2 | EPHX2 |
| P22894 | MMP8_HUMAN | Neutrophil collagenase | MMP8 |
| P55055 | NR1H2_HUMAN | Oxysterols receptor LXR-beta | NR1H2 |
| P35221 | CTNA1_HUMAN | Catenin alpha-1 | CTNNA1 |
| P43235 | CATK_HUMAN | Cathepsin K | CTSK |
| P05413 | FABPH_HUMAN | Fatty acid-binding protein, heart | FABP3 |
| Q00987 | MDM2_HUMAN | E3 ubiquitin-protein ligase Mdm2 | MDM2 |
| Q07869 | PPARA_HUMAN | Peroxisome proliferator-activated receptor alpha | PPARA |
| Q14994 | NR1I3_HUMAN | Nuclear receptor subfamily 1 group I member 3 | NR1I3 |
| P08709 | FA7_HUMAN | Coagulation factor VII | F7 |
| P31751 | AKT2_HUMAN | RAC-beta serine/threonine-protein kinase | AKT2 |
| P16442 | BGAT_HUMAN | Histo-blood group ABO system transferase | ABO |
| P11586 | C1TC_HUMAN | C-1-tetrahydrofolate synthase, cytoplasmic | MTHFD1 |
| P11712 | CP2C9_HUMAN | Cytochrome P450 2C9 | CYP2C9 |
| O60674 | JAK2_HUMAN | Tyrosine-protein kinase JAK2 | JAK2 |
| P15090 | FABP4_HUMAN | Fatty acid-binding protein, adipocyte | FABP4 |
| P39900 | MMP12_HUMAN | Macrophage metalloelastase | MMP12 |
| O75469 | NR1I2_HUMAN | Nuclear receptor subfamily 1 group I member 2 | NR1I2 |
| P05091 | ALDH2_HUMAN | Aldehyde dehydrogenase, mitochondrial | ALDH2 |
| P03951 | FA11_HUMAN | Coagulation factor XI | F11 |
| P08253 | MMP2_HUMAN | 72 kDa type IV collagenase | MMP2 |
| P60568 | IL2_HUMAN | Interleukin-2 | IL2 |
| P14780 | MMP9_HUMAN | Matrix metalloproteinase-9 | MMP9 |
| P25774 | CATS_HUMAN | Cathepsin S | CTSS |
| P06702 | S10A9_HUMAN | Protein S100-A9 | S100A9 |
| P80188 | NGAL_HUMAN | Neutrophil gelatinase-associated lipocalin | LCN2 |
| P11473 | VDR_HUMAN | Vitamin D3 receptor | VDR |
| P09601 | HMOX1_HUMAN | Heme oxygenase 1 | HMOX1 |
| Q02763 | TIE2_HUMAN | Angiopoietin-1 receptor | TEK |
| P03956 | MMP1_HUMAN | Interstitial collagenase | MMP1 |
| Q13231 | CHIT1_HUMAN | Chitotriosidase-1 | CHIT1 |
| P08473 | NEP_HUMAN | Neprilysin | MME |
| P17931 | LEG3_HUMAN | Galectin-3 | LGALS3 |
| P61812 | TGFB2_HUMAN | Transforming growth factor beta-2 proprotein | TGFB2 |
| P12821 | ACE_HUMAN | Angiotensin-converting enzyme | ACE |
| P07858 | CATB_HUMAN | Cathepsin B | CTSB |
| P09488 | GSTM1_HUMAN | Glutathione S-transferase Mu 1 | GSTM1 |
| Q04760 | LGUL_HUMAN | Lactoylglutathione lyase | GLO1 |
| Q9UNN8 | EPCR_HUMAN | Endothelial protein C receptor | PROCR |
| P29466 | CASP1_HUMAN | Caspase-1 | CASP1 |
| P42224 | STAT1_HUMAN | Signal transducer and activator of transcription 1-alpha/beta | STAT1 |
| Q93088 | BHMT1_HUMAN | Betaine--homocysteine S-methyltransferase 1 | BHMT |
| P35557 | HXK4_HUMAN | Hexokinase-4 | GCK |
| P06213 | INSR_HUMAN | Insulin receptor | INSR |
| Q9BZ11 | ADA33_HUMAN | Disintegrin and metalloproteinase domain-containing protein 33 | ADAM33 |
| P02679 | FIBG_HUMAN | Fibrinogen gamma chain | FGG |
| Q04206 | TF65_HUMAN | Transcription factor p65 | RELA |
| P31749 | AKT1_HUMAN | RAC-alpha serine/threonine-protein kinase | AKT1 |
| P15692 | VEGFA_HUMAN | Vascular endothelial growth factor A | VEGFA |
| P38936 | CDN1A_HUMAN | Cyclin-dependent kinase inhibitor 1 | CDKN1A |
| P28482 | MK01_HUMAN | Mitogen-activated protein kinase 1 | MAPK1 |
| P22301 | IL10_HUMAN | Interleukin-10 | IL10 |
| P01375 | TNFA_HUMAN | Tumor necrosis factor | TNF |
| P05412 | JUN_HUMAN | Transcription factor AP-1 | JUN |
| P05231 | IL6_HUMAN | Interleukin-6 | IL6 |
| P04637 | P53_HUMAN | Cellular tumor antigen p53 | TP53 |
| P25963 | IKBA_HUMAN | NF-kappa-B inhibitor alpha | NFKBIA |
| P47989 | XDH_HUMAN | Xanthine dehydrogenase/oxidase | XDH |
| P11387 | TOP1_HUMAN | DNA topoisomerase 1 | TOP1 |
| P05362 | ICAM1_HUMAN | Intercellular adhesion molecule 1 | ICAM1 |
| P01579 | IFNG_HUMAN | Interferon gamma | IFNG |
| P05112 | IL4_HUMAN | Interleukin-4 | IL4 |
| P14672 | GLUT4_HUMAN | Solute carrier family 2, facilitated glucose transporter member 4 | SLC2A4 |
| P29965 | CD40L_HUMAN | CD40 ligand | CD40LG |
| O14684 | PTGES_HUMAN | Prostaglandin E synthase | PTGES |
| P35228 | NOS2_HUMAN | Nitric oxide synthase, inducible | NOS2 |
| P12643 | BMP2_HUMAN | Bone morphogenetic protein 2 | BMP2 |
| P02652 | APOA2_HUMAN | Apolipoprotein A-II | APOA2 |
| P27338 | AOFB_HUMAN | Amine oxidase | MAOB |
| P00734 | THRB_HUMAN | Prothrombin | F2 |
| P53779 | MK10_HUMAN | Mitogen-activated protein kinase 10 | MAPK10 |
| P23946 | CMA1_HUMAN | Chymase | CMA1 |
| P10415 | BCL2_HUMAN | Apoptosis regulator Bcl-2 | BCL2 |
| P01100 | FOS_HUMAN | Proto-oncogene c-Fos | FOS |
| P49327 | FAS_HUMAN | Fatty acid synthase | FASN |
| P25101 | EDNRA_HUMAN | Endothelin-1 receptor | EDNRA |
| P05305 | EDN1_HUMAN | Endothelin-1 | EDN1 |
| P08684 | CP3A4_HUMAN | Cytochrome P450 3A4 | CYP3A4 |
| P04798 | CP1A1_HUMAN | Cytochrome P450 1A1 | CYP1A1 |
| P42892 | ECE1_HUMAN | Endothelin-converting enzyme 1 | ECE1 |
| P05106 | ITB3_HUMAN | Integrin beta-3 | ITGB3 |
| P40763 | STAT3_HUMAN | Signal transducer and activator of transcription 3 | STAT3 |
| P08519 | APOA_HUMAN | Apolipoprotein | LPA |
| P02743 | SAMP_HUMAN | Serum amyloid P-component | APCS |
| P84077 | ARF1_HUMAN | ADP-ribosylation factor 1 | ARF1 |
| P11511 | CP19A_HUMAN | Aromatase | CYP19A1 |
| Q16665 | HIF1A_HUMAN | Hypoxia-inducible factor 1-alpha | HIF1A |
| P24557 | THAS_HUMAN | Thromboxane-A synthase | TBXAS1 |
| P08514 | ITA2B_HUMAN | Integrin alpha-IIb | ITGA2B |
| P00751 | CFAB_HUMAN | Complement factor B | CFB |
| Q9NP99 | TREM1_HUMAN | Triggering receptor expressed on myeloid cells 1 | TREM1 |
| P00749 | UROK_HUMAN | Urokinase-type plasminogen activator | PLAU |
| P08588 | ADRB1_HUMAN | Beta-1 adrenergic receptor | ADRB1 |
| Q07812 | BAX_HUMAN | Apoptosis regulator BAX | BAX |
| P01137 | TGFB1_HUMAN | Transforming growth factor beta-1 proprotein | TGFB1 |
| P27169 | PON1_HUMAN | Serum paraoxonase/arylesterase 1 | PON1 |
| P01584 | IL1B_HUMAN | Interleukin-1 beta | IL1B |
| P37173 | TGFR2_HUMAN | TGF-beta receptor type-2 | TGFBR2 |
| P01133 | EGF_HUMAN | Pro-epidermal growth factor | EGF |
| P42771 | CDN2A_HUMAN | Cyclin-dependent kinase inhibitor 2A | CDKN2A |
| P19419 | ELK1_HUMAN | ETS domain-containing protein Elk-1 | ELK1 |
| P04049 | RAF1_HUMAN | RAF proto-oncogene serine/threonine-protein kinase | RAF1 |
| P00441 | SODC_HUMAN | Superoxide dismutase | SOD1 |
| Q03135 | CAV1_HUMAN | Caveolin-1 | CAV1 |
| P13726 | TF_HUMAN | Tissue factor | F3 |
| P17302 | CXA1_HUMAN | Gap junction alpha-1 protein | GJA1 |
| P13500 | CCL2_HUMAN | C-C motif chemokine 2 | CCL2 |
| P16581 | LYAM2_HUMAN | E-selectin | SELE |
| P19320 | VCAM1_HUMAN | Vascular cell adhesion protein 1 | VCAM1 |
| P10145 | IL8_HUMAN | Interleukin-8 | CXCL8 |
| P05771 | KPCB_HUMAN | Protein kinase C beta type | PRKCB |
| P04792 | HSPB1_HUMAN | Heat shock protein beta-1 | HSPB1 |
| P00750 | TPA_HUMAN | Tissue-type plasminogen activator | PLAT |
| P07204 | TRBM_HUMAN | Thrombomodulin | THBD |
| P05121 | PAI1_HUMAN | Plasminogen activator inhibitor 1 | SERPINE1 |
| P09917 | LOX5_HUMAN | Polyunsaturated fatty acid 5-lipoxygenase | ALOX5 |
| P01583 | IL1A_HUMAN | Interleukin-1 alpha | IL1A |
| P05164 | PERM_HUMAN | Myeloperoxidase | MPO |
| P14598 | NCF1_HUMAN | Neutrophil cytosol factor 1 | NCF1 |
| Q9UNQ0 | ABCG2_HUMAN | Broad substrate specificity ATP-binding cassette transporter ABCG2 | ABCG2 |
| Q16236 | NF2L2_HUMAN | Nuclear factor erythroid 2-related factor 2 | NFE2L2 |
| P35869 | AHR_HUMAN | Aryl hydrocarbon receptor | AHR |
| P02461 | CO3A1_HUMAN | Collagen alpha-1 | COL3A1 |
| O96017 | CHK2_HUMAN | Serine/threonine-protein kinase Chk2 | CHEK2 |
| P02741 | CRP_HUMAN | C-reactive protein | CRP |
| P02778 | CXL10_HUMAN | C-X-C motif chemokine 10 | CXCL10 |
| O15111 | IKKA_HUMAN | Inhibitor of nuclear factor kappa-B kinase subunit alpha | CHUK |
| P10451 | OSTP_HUMAN | Osteopontin | SPP1 |
| Q13950 | RUNX2_HUMAN | Runt-related transcription factor 2 | RUNX2 |
| P17936 | IBP3_HUMAN | Insulin-like growth factor-binding protein 3 | IGFBP3 |
| P01344 | IGF2_HUMAN | Insulin-like growth factor II | IGF2 |
| P27361 | MK03_HUMAN | Mitogen-activated protein kinase 3 | MAPK3 |
| P01130 | LDLR_HUMAN | Low-density lipoprotein receptor | LDLR |
| P04040 | CATA_HUMAN | Catalase | CAT |
| P55157 | MTP_HUMAN | Microsomal triglyceride transfer protein large subunit | MTTP |
| P04114 | APOB_HUMAN | Apolipoprotein B-100 | APOB |
| P22309 | UD11_HUMAN | UDP-glucuronosyltransferase 1A1 | UGT1A1 |
| P36956 | SRBP1_HUMAN | Sterol regulatory element-binding protein 1 | SREBF1 |
| P33527 | MRP1_HUMAN | Multidrug resistance-associated protein 1 | ABCC1 |
| Q15848 | ADIPO_HUMAN | Adiponectin | ADIPOQ |
| O75908 | SOAT2_HUMAN | Sterol O-acyltransferase 2 | SOAT2 |
| P35610 | SOAT1_HUMAN | Sterol O-acyltransferase 1 | SOAT1 |
| P78380 | OLR1_HUMAN | Oxidized low-density lipoprotein receptor 1 | OLR1 |
| O14920 | IKKB_HUMAN | Inhibitor of nuclear factor kappa-B kinase subunit beta | IKBKB |
| P09038 | FGF2_HUMAN | Fibroblast growth factor 2 | FGF2 |
| P09238 | MMP10_HUMAN | Stromelysin-2 | MMP10 |
| P16220 | CREB1_HUMAN | Cyclic AMP-responsive element-binding protein 1 | CREB1 |
| P04141 | CSF2_HUMAN | Granulocyte-macrophage colony-stimulating factor | CSF2 |
| P16284 | PECA1_HUMAN | Platelet endothelial cell adhesion molecule | PECAM1 |
| P48023 | TNFL6_HUMAN | Tumor necrosis factor ligand superfamily member 6 | FASLG |
| P01033 | TIMP1_HUMAN | Metalloproteinase inhibitor 1 | TIMP1 |
| Q86VB7 | C163A_HUMAN | Scavenger receptor cysteine-rich type 1 protein M130 | CD163 |
| Q96EB6 | SIR1_HUMAN | NAD-dependent protein deacetylase sirtuin-1 | SIRT1 |
| P16035 | TIMP2_HUMAN | Metalloproteinase inhibitor 2 | TIMP2 |
| P25445 | TNR6_HUMAN | Tumor necrosis factor receptor superfamily member 6 | FAS |
| P16109 | LYAM3_HUMAN | P-selectin | SELP |
| P30556 | AGTR1_HUMAN | Type-1 angiotensin II receptor | AGTR1 |
| P04085 | PDGFA_HUMAN | Platelet-derived growth factor subunit A | PDGFA |
| Q9BYF1 | ACE2_HUMAN | Angiotensin-converting enzyme 2 | ACE2 |
| P24298 | ALAT1_HUMAN | Alanine aminotransferase 1 | GPT |
| P46527 | CDN1B_HUMAN | Cyclin-dependent kinase inhibitor 1B | CDKN1B |
| P48357 | LEPR_HUMAN | Leptin receptor | LEPR |
| Q99541 | PLIN2_HUMAN | Perilipin-2 | PLIN2 |
| P25116 | PAR1_HUMAN | Proteinase-activated receptor 1 | F2R |
| P30044 | PRDX5_HUMAN | Peroxiredoxin-5, mitochondrial | PRDX5 |
| P05181 | CP2E1_HUMAN | Cytochrome P450 2E1 | CYP2E1 |
| P35222 | CTNB1_HUMAN | Catenin beta-1 | CTNNB1 |
| P14923 | PLAK_HUMAN | Junction plakoglobin | JUP |

**Table S3** The top 30 significant entries of GO biological process analyses

| Term ID | Term description | Gene count | Strength | Fdr |
| --- | --- | --- | --- | --- |
| GO:0002682 | Regulation of immune system process | 81 | 0.69 | 3.24E-31 |
| GO:0006954 | Inflammatory response | 54 | 0.94 | 7.38E-31 |
| GO:0043408 | Regulation of MAPK cascade | 53 | 0.83 | 8.44E-26 |
| GO:0048660 | Regulation of smooth muscle cell proliferation | 30 | 1.26 | 7.94E-25 |
| GO:0019216 | Regulation of lipid metabolic process | 40 | 1.00 | 1.42E-24 |
| GO:0006979 | Response to oxidative stress | 40 | 0.97 | 1.10E-23 |
| GO:0008015 | Blood circulation | 41 | 0.94 | 2.57E-23 |
| GO:0050678 | Regulation of epithelial cell proliferation | 38 | 0.95 | 8.23E-22 |
| GO:0070848 | Response to growth factor | 43 | 0.87 | 8.24E-22 |
| GO:0001936 | Regulation of endothelial cell proliferation | 27 | 1.23 | 1.52E-21 |
| GO:0001568 | Blood vessel development | 41 | 0.84 | 5.69E-20 |
| GO:0001817 | Regulation of cytokine production | 47 | 0.74 | 4.75E-19 |
| GO:0008202 | Steroid metabolic process | 29 | 0.99 | 2.40E-17 |
| GO:0030155 | Regulation of cell adhesion | 45 | 0.69 | 1.29E-16 |
| GO:0050865 | Regulation of cell activation | 41 | 0.73 | 3.23E-16 |
| GO:0007507 | Heart development | 37 | 0.76 | 1.35E-15 |
| GO:0008217 | Regulation of blood pressure | 24 | 1.03 | 2.74E-15 |
| GO:0043122 | Regulation of I-kappaB kinase/NF-kappaB signaling | 21 | 0.85 | 3.02E-10 |
| GO:0008203 | Cholesterol metabolic process | 15 | 1.04 | 1.28E-09 |
| GO:0010506 | Regulation of autophagy | 19 | 0.67 | 9.92E-07 |

**Table S4** The top 30 significant entries of GO molecular function analyses

| Term ID | Term description | Gene count | Strength | Fdr |
| --- | --- | --- | --- | --- |
| GO:0005515 | Protein binding | 180 | 0.33 | 4.60E-34 |
| GO:0005102 | Signaling receptor binding | 78 | 0.65 | 9.04E-27 |
| GO:0019899 | Enzyme binding | 78 | 0.51 | 3.59E-18 |
| GO:0043167 | Ion binding | 130 | 0.27 | 1.87E-13 |
| GO:0008289 | Lipid binding | 41 | 0.65 | 1.07E-12 |
| GO:0005126 | Cytokine receptor binding | 25 | 0.9 | 2.38E-12 |
| GO:0005496 | Steroid binding | 17 | 1.16 | 7.84E-12 |
| GO:0048018 | Receptor ligand activity | 31 | 0.73 | 2.08E-11 |
| GO:0003824 | Catalytic activity | 117 | 0.26 | 4.35E-11 |
| GO:0008233 | Peptidase activity | 31 | 0.64 | 2.71E-09 |
| GO:0036094 | Small molecule binding | 65 | 0.35 | 3.97E-08 |
| GO:0008083 | Growth factor activity | 15 | 0.9 | 2.34E-07 |
| GO:0016209 | Antioxidant activity | 11 | 1.1 | 4.85E-07 |
| GO:0004707 | MAP kinase activity | 4 | 1.36 | 2.50E-03 |
| GO:0051059 | NF-kappaB binding | 5 | 1.13 | 2.70E-03 |
| GO:0032934 | Sterol binding | 6 | 0.92 | 5.20E-03 |
| GO:0015485 | Cholesterol binding | 5 | 0.92 | 1.73E-02 |
| GO:0005164 | Tumor necrosis factor receptor binding | 4 | 1.03 | 2.48E-02 |
| GO:0008384 | IkappaB kinase activity | 2 | 1.76 | 3.81E-02 |
| GO:0008392 | Arachidonic acid epoxygenase activity | 3 | 1.21 | 3.81E-02 |

**Table S5** The top 30 significant entries of GO cellular component analyses

| Term ID | Term description | Gene count | Strength | Fdr |
| --- | --- | --- | --- | --- |
| GO:0005615 | Extracellular space | 125 | 0.52 | 1.69E-35 |
| GO:0005576 | Extracellular region | 139 | 0.46 | 1.09E-34 |
| GO:0031982 | Vesicle | 120 | 0.42 | 3.97E-24 |
| GO:0045121 | Membrane raft | 35 | 0.97 | 6.36E-20 |
| GO:0012505 | Endomembrane system | 120 | 0.34 | 1.14E-17 |
| GO:0009986 | Cell surface | 49 | 0.67 | 8.44E-17 |
| GO:0031410 | Cytoplasmic vesicle | 82 | 0.45 | 1.16E-16 |
| GO:0030141 | Secretory granule | 48 | 0.67 | 1.30E-16 |
| GO:0070062 | Extracellular exosome | 74 | 0.48 | 2.68E-16 |
| GO:0071944 | Cell periphery | 132 | 0.28 | 4.39E-15 |
| GO:0005901 | Caveola | 17 | 1.27 | 8.17E-14 |
| GO:0031983 | Vesicle lumen | 28 | 0.87 | 1.05E-13 |
| GO:0009897 | External side of plasma membrane | 30 | 0.82 | 1.22E-13 |
| GO:0070013 | Intracellular organelle lumen | 123 | 0.27 | 3.47E-13 |
| GO:0098552 | Side of membrane | 36 | 0.7 | 3.47E-13 |
| GO:0043235 | Receptor complex | 29 | 0.78 | 3.96E-12 |
| GO:0060205 | Cytoplasmic vesicle lumen | 26 | 0.84 | 3.96E-12 |
| GO:0043231 | Intracellular membrane-bounded organelle | 192 | 0.13 | 1.93E-11 |
| GO:0034774 | Secretory granule lumen | 25 | 0.83 | 2.00E-11 |
| GO:0005737 | Cytoplasm | 191 | 0.13 | 2.08E-11 |

**Table S6** 20 significant entries related to AS in KEGG pathway enrichment analyses

| Term ID | Pathway | Gene count | Strength | Fdr |
| --- | --- | --- | --- | --- |
| hsa05418 | Fluid shear stress and atherosclerosis | 38 | 1.40 | 1.51E-36 |
| hsa04657 | IL-17 signaling pathway | 28 | 1.42 | 3.32E-27 |
| hsa04668 | TNF signaling pathway | 28 | 1.34 | 2.04E-25 |
| hsa04010 | MAPK signaling pathway | 36 | 1.03 | 1.04E-23 |
| hsa04151 | PI3K-Akt signaling pathway | 37 | 0.96 | 4.38E-22 |
| hsa04068 | FoxO signaling pathway | 26 | 1.25 | 7.15E-22 |
| hsa04926 | Relaxin signaling pathway | 25 | 1.23 | 1.00E-20 |
| hsa04066 | HIF-1 signaling pathway | 23 | 1.29 | 3.16E-20 |
| hsa04620 | Toll-like receptor signaling pathway | 20 | 1.24 | 6.78E-17 |
| hsa04920 | Adipocytokine signaling pathway | 16 | 1.31 | 1.15E-14 |
| hsa04062 | Chemokine signaling pathway | 20 | 0.97 | 1.63E-12 |
| hsa04024 | cAMP signaling pathway | 19 | 0.90 | 6.89E-11 |
| hsa04370 | VEGF signaling pathway | 12 | 1.27 | 6.89E-11 |
| hsa04064 | NF-kappa B signaling pathway | 14 | 1.08 | 2.32E-10 |
| hsa01523 | Antifolate resistance | 8 | 1.35 | 3.94E-08 |
| hsa04152 | AMPK signaling pathway | 12 | 0.93 | 1.20E-07 |
| hsa04614 | Renin-angiotensin system | 6 | 1.35 | 2.11E-06 |
| hsa04140 | Autophagy - animal | 9 | 0.77 | 8.14E-05 |
| hsa04979 | Cholesterol metabolism | 6 | 1.03 | 8.14E-05 |
| hsa04270 | Vascular smooth muscle contraction | 8 | 0.72 | 4.50E-04 |
